# Supplementary material
Source: PubMed Central journal article supplement (PMC7156969)
Supplement: EMBJ-39-e104270-s001.pdf [file EMBJ-39-e104270-s001.pdf]

## TABLE OF CONTENTS

1. **Appendix Figure S1: Hematopoietic clusters are kinetically active**
2. **Appendix Figure S2: Hematopoietic clusters contain actively dividing cells**
3. **Appendix Figure S3: The Notch ligand Jagged1 is preferentially expressed in the aortic endothelium**
4. **Appendix Figure S4: Total number of clusters and  $\alpha$ DII4 treatment effect is not dependent from the background of the animal analyzed.**
5. **Appendix Table legends**
6. **Appendix Table S1: ICGS clustering form scRNA-seq**
7. **Appendix Table S2: DEG after  $\alpha$ DII4-treatment.**

**Appendix Figure S1: Hematopoietic clusters are kinetically active** (A) Dot plots represent Ki67-expression profile gated on CD31<sup>+</sup>Kit<sup>-</sup>CD45<sup>-</sup>, CD31<sup>+</sup>Kit<sup>+</sup>CD45<sup>-</sup>, CD31<sup>+</sup>Kit<sup>+</sup>CD45<sup>+</sup>populations. (B) Quantification based on FACS analyses of Ki67-expressing cells in endothelial and hematopoietic populations. Mean±SD (n=3) (C-D) Representative confocal images of Ki67 staining in transversal sections of E10.5 embryo co-stained with Kit<sup>+</sup> (green,C) and CD31<sup>+</sup> (green, D). White arrowheads indicate cells actively proliferating (Ki67<sup>+</sup>). Note that all cells Kit<sup>+</sup> are Ki67<sup>+</sup> cells (C, white arrowhead), while in the endothelium only a portion of CD31<sup>+</sup> cells are also Ki67<sup>+</sup> (D, white arrowheads). Multistack reconstruction of confocal images. Scale bar: 30μm (overview) and 10μm (magnification).

### Appendix Fig S1

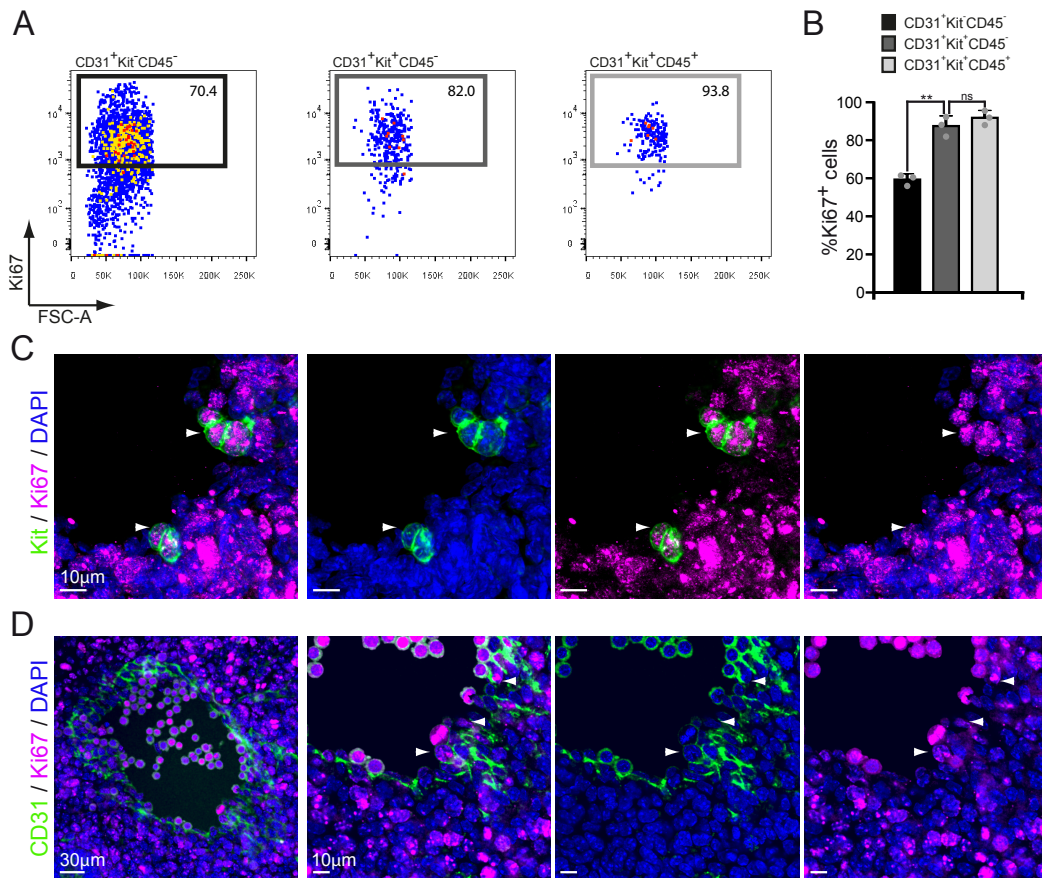

**Appendix Figure S2: Hematopoietic clusters contain actively dividing cells** (A) Expression of the mitotic marker P-H3. White arrow indicates the presence of dividing cells in IAHC. CD31 is shown in white in the image, in black in the label. Multistack reconstruction of confocal images. Scale bar: 20  $\mu$ m. (B) Snapshots of Movie 3. CD41:YFP;H2B-GFP cells undergo mitosis (white arrow) showing that division inside the clusters occurs asynchronously. Embryos were injected with  $\alpha$ CD31<sup>594</sup> directly conjugated antibody to visualize the endothelium. Scale bar: 20 $\mu$ m; Time in hh:mm:ss. (C) Snapshots of Movie 4. CD41:YFP-expressing cells in the aortic endothelium generate a larger and more complex structure when compared to the initial stages of time-lapse recording (white arrow). Embryos were injected with  $\alpha$ CD31<sup>594</sup> directly conjugated antibody to visualize the endothelium and Draq5 to visualize the nuclei. Scale bar: 20 $\mu$ m. Time in hh:mm:ss.

## Appendix Fig S2

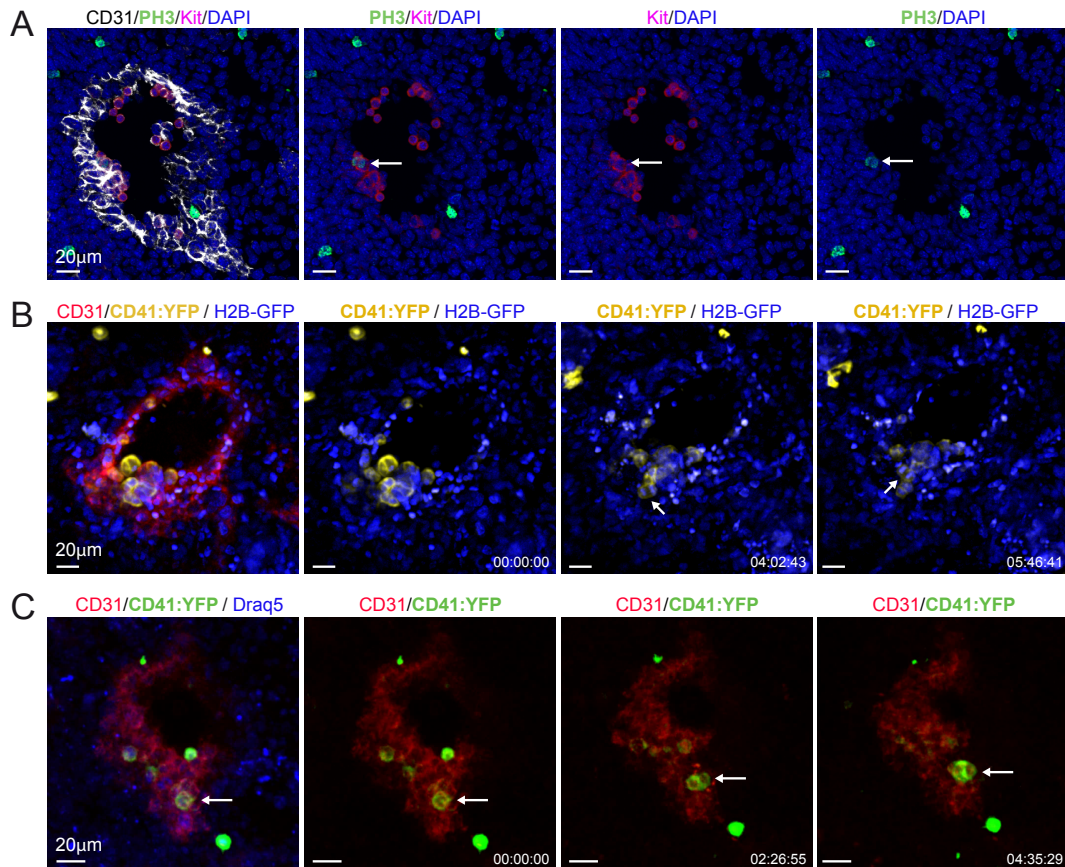

**Appendix Figure S3: The Notch ligand Jagged1 is preferentially expressed in the aortic endothelium.** Multistack reconstruction of confocal images of E10.5 embryos. Transversal section stained with Jag1(green) and Kit (magenta). Lower panels (magnification) show detail of the aortic endothelium. Scale bar: 20µm.

Appendix Fig S3

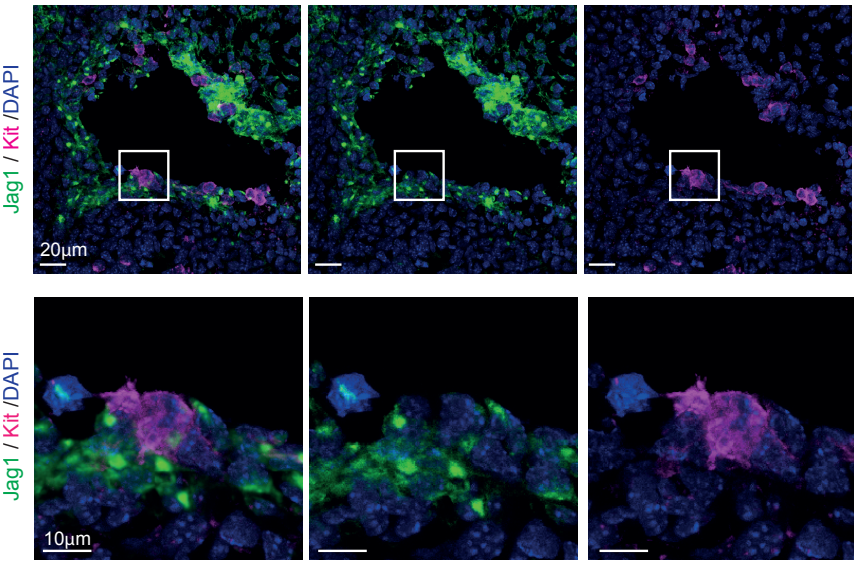

**Appendix Figure S4: Total number of clusters and  $\alpha$ Dll4 treatment effect is not dependent from the background of the animal analyzed.** We quantified the number of total clusters in tamoxifen-treated  $\text{VeCadCre}^{\text{ER}}:\text{Confetti}^{\text{fl/fl}}$  embryos, to find that the total number remains unchanged and comparable to the wild-type mice analyzed in Figure 4 (A,  $n=3$ ). Additionally, we could not find any difference when treating the  $\text{VeCadCre}^{\text{ER}}:\text{Confetti}^{\text{fl/fl}}$  embryos with IgG or  $\alpha$ Dll4 in terms of category distribution of cluster sizes (B,C). As in the wild-type embryos, treatment with  $\alpha$ Dll4 induces the formation of large clusters (more than 10  $\text{Kit}^+$ -cells/cluster) compared to the IgG treated ( $n=3$ ). 3).

## Appendix Fig S4

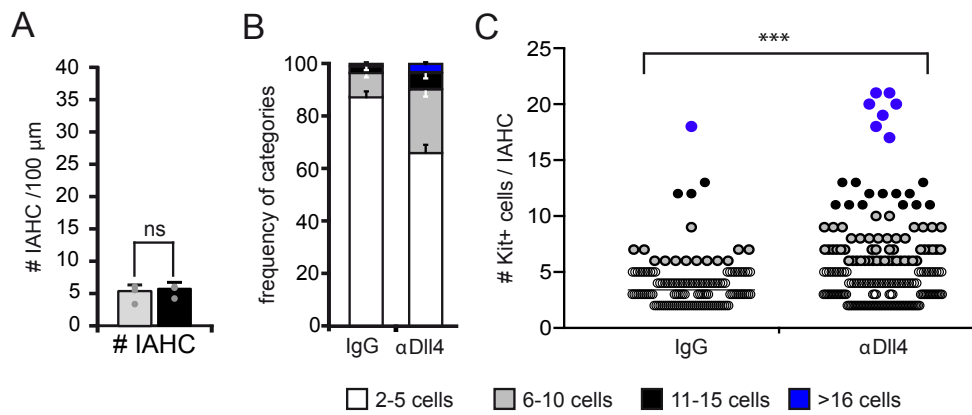

**Supplementary Table 1: ICGS clustering form scRNA-seq (excel document).**

Table contains selected representative genes for each cluster as defined by ICGS.

**Supplementary Table 2: DEG after  $\alpha$ DII4-treatment.** Table shows differentially upregulated and downregulated genes following DII4 treatment identified in each cluster by scRNAseq.

Appendix Table S1

| cluster 10 | cluster 9 | cluster 8     | cluster 7 | cluster 6 | cluster 5 | cluster 4 | cluster 3     | cluster 2 | cluster 1 |
|------------|-----------|---------------|-----------|-----------|-----------|-----------|---------------|-----------|-----------|
| Smad5      | Samd5     | Pde3a         | Hspe1     | Sdpr      | Slc2a3    | Ell2      | Ppif          | Lgals9    | Myo1g     |
| Lphn2      | Gata4     | Serpine2      | Hspa1b    | AU023871  | Bnip3     | Myb       | Alox5         | Dok2      | Def6      |
| Itpkb      | Tbx20     | Rps6ka6       | Hsp90aa1  | Ly6g6f    | Slc16a3   | Ikzf1     | Ptger3        | Lyz2      | Acss2     |
| Bcl2       | Wisp1     | Clip3         |           | Pf4       |           | Rhag      | Nfe2          | Coro1a    | Il17ra    |
| Zfp69      | Krt13     | Unc5c         |           | Trem1     |           | Car1      | Mbp           | Cd44      | Hemgn     |
| Klhl4      | Gpr153    | Ldhb          |           | Gp1bb     |           | Gm15915   | Gfi1b         | Plcg2     | Steap3    |
| Nckap5l    | Spon1     | Aldh1a2       |           | Gp9       |           | Mt2       | Ubash3a       | Celf2     | Ptprcap   |
| Dock4      | Gm17455   | Scube3        |           | Gucy1a3   |           | Slc38a5   | Muc13         | Cd200r1   | Rac2      |
| Pcdh17     | Dusp26    | 2610203C20Rik |           | Rab27b    |           | Ermap     | Smim1         | F13a1     | Nckap1l   |
| Fam43a     | Ifitm1    | Mmp16         |           | F10       |           | Kcnn4     | Unc13d        | Ikzf2     | Arhgap9   |
| Clec1b     | Sox6      | Dock7         |           | Rbpms2    |           | Klf1      | Cited4        | Angpt1    | Khk       |
| Abca1      | Dkk2      | Pdlim4        |           | Lat       |           | Emilin2   | Gata1         | Nupr1     | Runx1     |
| Arhgef12   | Ppp2r2b   | Nsg1          |           | P2ry1     |           | Hbb-bh1   | Sptb          | Cyth4     | Sfpi1     |
| Timp3      | Has2      | Pdgfc         |           | Fam65c    |           | Hbb-b1    | Unc119        | Art4      | Adcy7     |
| Fxyd5      | Grh13     | Tmem132c      |           | Sardh     |           | Itga4     | Samd14        | Mctp1     | Mt1       |
| Prex1      | Slc1a3    | Tenm3         |           | Rhof      |           | Cpox      | Blvrb         |           | Cd37      |
| Cd38       | Parm1     | Pcolce        |           | Cmah      |           | Acss1     | Hbb-b2        |           | Tmod1     |
| Prkcdbp    | Daam2     | Rimklb        |           | Gp1ba     |           | AC147219. | Homer2        |           | Itgal     |
| Elmo1      | Stbd1     | Frzb          |           | Thbs1     |           | Cdk6      | Zfpm1         |           | Plac8     |
| Hecw2      | Ppfibp2   | Cdh11         |           | Grap2     |           | B4galnt1  | Car2          |           | Psma8     |
| Ppp1r13b   | Pdprn     | Alx1          |           | Kcnj5     |           | Rnf128    | Nt5c3         |           | Xk        |
| Gnai2      | Tagln     | Pdgfrb        |           | Mrvi1     |           |           | Mapkapk3      |           | Wdfy4     |
| Shroom2    | Colec10   | Gpc6          |           | Capn3     |           |           | Cited2        |           | Soat2     |
| Cyyr1      | Egfr      | Ano1          |           | Ache      |           |           | Atp8a1        |           | Ctsc      |
| Arhgef7    | Ncam1     | Msx2          |           | Fcer1g    |           |           | Emp3          |           | Bid       |
| Map4k2     | Tnc       | Col26a1       |           | Itgb3     |           |           | Stxbp2        |           | Pim2      |
| Rgl1       | Col6a2    | Bcat1         |           | Pls1      |           |           | Nmnat3        |           | Perp      |
| Ushbp1     | Loxl1     | Sulf1         |           | Tubb1     |           |           | Elf1          |           | Ptpn7     |
| Dock9      | Krt18     | Wt1           |           | Tuba8     |           |           | Rabgap1l      |           | Slc6a13   |
| Anxa3      | Adamts18  | Sema3b        |           | Il10ra    |           |           | Sash3         |           | Mpo       |
| Myo10      | Emp2      | Igdcc3        |           | Sla       |           |           | Srgn          |           | Fam203a   |
| Pald1      | Tcf21     | S1pr2         |           | Tmem40    |           |           | Ston2         |           | Sapcd1    |
| Rapgef5    | Olfml3    | Ntm           |           | F2rl2     |           |           | Dock8         |           | Mthfd2    |
| Msn        | Dsp       | Bmpr1a        |           | Gucy1b3   |           |           | Ptpn6         |           |           |
| Snrk       | Acta2     | Nfatc4        |           | Cd300a    |           |           | Prkar2b       |           |           |
| Mast4      | Shisa3    | Hoxd11        |           | Irs2      |           |           | Gpr56         |           |           |
| Rapgef4    | Crispld2  | Tmem119       |           | Tec       |           |           | Pla2g4a       |           |           |
| Lcp1       | Col6a1    | Eya4          |           | Rgs1      |           |           | Hmha1         |           |           |
| Nos3       | Masp1     | Kctd15        |           | Rab32     |           |           | Prkcq         |           |           |
| Lpar6      | Slit3     | Ephb3         |           | Stx11     |           |           | Taok3         |           |           |
| Notch4     | Rerg      | Ror2          |           | Proser2   |           |           | I830077J02Rik |           |           |
| Rhoj       | Pde9a     | Sema3a        |           |           |           |           | Smim3         |           |           |
| Srgap1     | 2610528/  | Zfhx4         |           |           |           |           | Sord          |           |           |
| Adam15     | Ltbp1     | Spsb4         |           |           |           |           | Lrmp          |           |           |
| Arap3      | Postn     | Mgat3         |           |           |           |           | Slc16a10      |           |           |
| Piezo2     | Hand1     | Crabp1        |           |           |           |           | Prkca         |           |           |
| Sh3bp5     | Krt8      | Crabp2        |           |           |           |           | Gp5           |           |           |

|           |          |               |               |
|-----------|----------|---------------|---------------|
| Rcsd1     | Crb2     | Tbx5          | Dapp1         |
| Tcf4      | Foxf1    | Lix1          | Sla2          |
| Arhgap29  | Steap1   | Ednra         | Itga2b        |
| Yes1      | Pknox2   | Bmp7          | Susd3         |
| Pde4b     | Islr     | Prrx2         | Slc35d3       |
| Arhgap18  | Bcam     | Capn6         | Rgs10         |
| Ets2      | Thbs4    | Prrx1         | Slc14a1       |
| Sema6d    | Tmem108  | Scube1        | Itgb2         |
| Sox17     | Gpr50    | Ddr2          | Vav1          |
| Arhgef15  | Fam162b  | Tbx3          | Mpl           |
| Tspan18   | Fbln7    | Rspo2         | Rgs18         |
| Amotl1    | Npy1r    | Pard6g        | Atp2a3        |
| Ptpm      | Grhl1    | Wscd2         | P2rx1         |
| Sox7      | Colec11  | Serinc2       | Plek          |
| Rasgrp3   | Actg2    | Ntn1          | Bin2          |
| Efna1     | Cnn1     | Alx3          | Fyb           |
| Dock6     | Sh3bgr   | Ngfr          | Fermt3        |
| Mcam      | Nell2    | Tmem200a      | Mfsd2b        |
| Gimap6    | Sst      | Col2a1        | Tuba4a        |
| Lama4     | Oacyl    | Wdr35         | Btk           |
| Mmrn2     | Prdm6    | Epha3         | Tspan32       |
| Plk2      | Timp2    | Fbln5         | Pnpo          |
| Egfl7     | Cthrc1   | Rspo4         | Ptpre         |
| S1pr1     | Popdc2   | sept-03       | Frrs1         |
| Rasip1    | Speg     | Dact1         | Tnik          |
| Gpr116    | Ddr1     | Gsc           | Slc9a3r1      |
| Tie1      | Col5a1   | Shox2         | Rbm38         |
| Eng       | Fzd2     | Crlf1         | Fut8          |
| Cdh5      | Axl      | Six1          | RP23-285C18.2 |
| Kdr       | Efnb1    | Dpep1         | Cd55          |
| Cd93      | Kif26b   | Osr1          | Meis1         |
| Plxnd1    | Smoc2    | Tbx18         |               |
| Adamts9   | Chpf     | Sorl1         |               |
| Rhob      | Tenm4    | Lhx2          |               |
| 2900026/  | Fgfr2    | Dkk1          |               |
| Cttnbp2nl | Pitx2    | Tfap2c        |               |
| Slc23a2   | Cdh3     | Tbx15         |               |
| Eogt      | Col3a1   | C130021I20Rik |               |
| Scarf1    | Col1a2   | Fibin         |               |
| Pea15a    | Col1a1   | Eepd1         |               |
| Exoc3l    | Myf9     | Emx2os        |               |
| Dcbld1    | Lama2    | Pcdh11x       |               |
| Grrp1     | Ccdc80   | Dcx           |               |
| She       | Col9a1   | Dach2         |               |
| Erg       | Prss35   | Mme           |               |
| Tmem204   | Cpz      | Magi2         |               |
| Cdc42ep1  | Adamts15 | 1700001L19Rik |               |
| Sipa1     | Fzd1     | Car11         |               |



|          |                    |         |
|----------|--------------------|---------|
| Plekhg1  | Clcf1              | Itgb8   |
| Crip2    | Col6a3             | Fam159a |
| Map4k5   | Dcn                |         |
| S100a16  | Lum                |         |
| Tgfr2    | Tmem45a            |         |
| Bcl6b    | Krt19              |         |
| N4bp3    | Pitx1              |         |
| F11r     | Tbx4               |         |
| Eld1     | Wnt2               |         |
| Sepp1    | Scrn1              |         |
| Aplnr    | ENSMUSG00000100510 |         |
| Hapln1   | Gata5              |         |
| Tmem88   | Grem2              |         |
| Thsd1    | Bicd1              |         |
| Pde2a    | Tspan7             |         |
| Gng11    | Robo2              |         |
| Robo4    | Epb4.1l3           |         |
| Cd34     | Fras1              |         |
| Pecam1   | Fbln2              |         |
| Sox18    | Epha7              |         |
| Stab1    | Gas1               |         |
| Flt4     | Vasn               |         |
| Emcn     | Sdc2               |         |
| Ecscr    | Runx1t1            |         |
| Esam     | Pcdh18             |         |
| Plvap    | Vcan               |         |
| Cldn5    | Pdgfra             |         |
| Mfng     | Lrp1               |         |
| Ehd2     | Rab34              |         |
| Bok      | Smarca1            |         |
| Crmp1    | Nnat               |         |
| Pcdh1    | Fat3               |         |
| Epha2    | Cxcl12             |         |
| Rassf2   | Mfap2              |         |
| Nfkbia   | H2afy2             |         |
| Nedd9    | Sdc1               |         |
| Mogat2   | Epha4              |         |
| Ppp1r16b | Arhgef40           |         |
| Lrp10    | Meis2              |         |
| Cd109    | Hsd11b2            |         |
| Pcdh12   | Zim1               |         |
| Spata13  | Fzd7               |         |
| Ptrf     | Clmp               |         |
| Litaf    | Lrrc17             |         |
| Kit      | Igfbp5             |         |
| Apbb2    | Meis3              |         |
| Kcnj2    | Wdr86              |         |
| Sparcl1  | Myrf               |         |

|          |               |
|----------|---------------|
| Fam102a  | Wnt5a         |
| Pde8a    | Des           |
| Arhgef28 | 6330403K07Rik |
| BC028528 | Sfrp1         |
| Upp1     | Cd248         |
| Dusp6    | Gpc3          |
| Gja1     | S1pr3         |
| Slc2a1   | Mab21l2       |
| Sh2d3c   | Ptn           |
| Kcne3    | Mfap4         |
| Tmem255  | Cpm           |
| Nid2     | Mmp23         |
| Trp53i11 | Ly6e          |
| Rell1    | Serping1      |
| Dll4     | Rgs5          |
| Igfbp3   | Wnt5b         |
| Cdc42ep3 | Hgf           |
| Itga3    | Igdcc4        |
| Spsb1    | Bnc2          |
| Slc7a7   | Dact2         |
| Tmem252  | Bmp5          |
| Cnn2     | Bnc1          |
| Kdm6b    | Msc           |
| St3gal1  | Adrb3         |
| Pim3     | Slc4a3        |
| Junb     | Vcam1         |
| Nr4a1    | Tead3         |
| Pdgfb    | Pde1a         |
| Dok4     | Cxcl13        |
| Dusp1    | Amph          |
| Odc1     | Cyp1b1        |
| Lipt2    | Hspa1a        |
| Wasf2    |               |
| Kctd12b  |               |
| D8Ert82e |               |
| Bcl2l11  |               |
| Fosl2    |               |
| Klf7     |               |
| Prkd2    |               |
| Nes      |               |
| Prdm1    |               |
| Tbx1     |               |
| Kitl     |               |
| Lrrc32   |               |
| Adora2a  |               |
| Crem     |               |
| Dusp2    |               |
| St8sia4  |               |

Apold1

Apln

Rcan3

Spry4

Nos2

Slc25a25

Zfp36

Egr1

Fos

Ier2

Tgfb1i1

Enpp2

Slco2b1

Vwa1

Foxq1

Apcdd1

Cdkn1a

2610019F03Rik

Slc39a8

Fam13c

Slc7a5

Cdh2

Foxf2

Igfbp7

Adamts12

Palmd

Htra3

Stx1a

Ecm1

Agrn

Itga1

Mkl2

Flnb

Lamc1

Mllt4

Wwtr1

Cgn1

Mmp14

Map4k4

Anxa6

Tmem2

Aplp2

Arhgap31

Ptprb

Prex2

Lpp

Sptbn1

Tjp1

|          |
|----------|
| Nrp1     |
| Notch1   |
| Lamb1    |
| Ece1     |
| Col18a1  |
| Elk3     |
| Myo1b    |
| Fit1     |
| Ramp2    |
| Pxdn     |
| Mpzl1    |
| Sparc    |
| Igf2     |
| Ets1     |
| Nid1     |
| Hspg2    |
| Col4a2   |
| Col4a1   |
| Adam19   |
| Epas1    |
| Acvr11   |
| Sptan1   |
| Mef2a    |
| Ppfibp1  |
| Itga5    |
| Ptprg    |
| Sh3pxd2a |
| Spag9    |
| Myh10    |
| Ctnnb1   |
| H19      |
| Fermt2   |
| Vim      |
| Marcks   |
| Igfbp4   |
| Serpinh1 |
| Mest     |
| Dbn1     |
| Nrep     |
| Anxa2    |
| Asb4     |
| Rhoc     |
| Tnfaip1  |
| Pvrl2    |
| Nrp2     |
| mt-Co1   |
| Ablim1   |
| Zfp532   |

Sesn2

Chac1

Trib3

Ero1l

Jun

Hspb1

Gm9817

Gm10382

## Appendix Table S2

| cluster 1 | cluster 2     | cluster 3 | cluster 4 | cluster 5     | cluster 6 | cluster 7 |
|-----------|---------------|-----------|-----------|---------------|-----------|-----------|
| Xist      | Hspg2         | Zfp748    | Sepp1     | Kdr           | Slc34a2   | Rabggb    |
| Dll4      | Nrp1          | Tspan6    | Ubxn8     | Mafk          | Hes6      | Foxo1     |
| Notch1    | Mecom         | Trerf1    | Plekha8   | Irs2          | Cd2ap     |           |
| Efna1     | Tjp1          |           | Atf3      | Mef2c         | Mir6236   |           |
| Sat1      | Tie1          |           | Ccdc92    | Decr2         | Zfp810    |           |
| Tsc22d1   | Gm5069        |           | B3gnt1    | Arl4a         | Rnf145    |           |
| Igfbp3    | RP23-309N14.1 |           | Dnajb14   | Casp9         | Dpysl2    |           |
| Vwf       | Efna1         |           | Rb1       | Egln3         | Zfand6    |           |
| Mpz1      | Pdcd4         |           | B3gat3    | Piezo1        | Ndufb9    |           |
| Adgrf5    | Spop          |           | Gab2      | Gng10         | Alg14     |           |
| Nisch     | Bdp1          |           | Flt1      | Eng           |           |           |
| Hey1      |               |           | Rap2a     | 4931414P19Rik |           |           |
| Ctnnb1    |               |           | Pabpc4l   |               |           |           |
| Aplp2     |               |           |           |               |           |           |
| Tgfbr2    |               |           |           |               |           |           |
| Rbm5      |               |           |           |               |           |           |
| Cdkn1c    |               |           |           |               |           |           |
| Kcnq1ot1  |               |           |           |               |           |           |

| cluster 1 | cluster 2 | cluster 3 | cluster 4  | cluster 5 | cluster 6   | cluster 7  |
|-----------|-----------|-----------|------------|-----------|-------------|------------|
| Rhoc      | Nts       | Tmem68    | Gm5141     | Aurka     | Apc         | Tbxa2r     |
| Cdkn1a    | Rpl18     | Pdgfb     | Hoxb7      | Mthfr     | Maged1      | Rhoc       |
| Nfkbia    | D17H6S53E | Cep85     | Fbxo10     | Wdhd1     | Alg10b      | Cth        |
| Icam1     |           | Polrmt    | Cfap97     | Wdr41     | Abhd5       | Zswim8     |
| Pfn1      |           | Zfp810    | Fez1       | Pdlim4    | Nsmf        | Tjp2       |
|           |           |           | 2410016O06 | Cd2ap     | Esam        | Cpt1a      |
|           |           |           | Gna12      | Adck1     | Jak3        | Igf2bp2    |
|           |           |           | Golga2     | Clstn1    | Capn2       | Cd276      |
|           |           |           | Nars2      | Arhgap11a | Tuba8       | Crebrf     |
|           |           |           | Polm       | Ints5     | Erc1        | Clip1      |
|           |           |           | Zbtb46     | Lrrc61    | Pros1       | Phf21a     |
|           |           |           | Pcdh7      | Ndufaf4   | Micall2     | Fut10      |
|           |           |           | Aacs       | Abtb1     | Fam117b     | Map3k6     |
|           |           |           | Gucd1      | Ebp       | Kank3       | Wwtr1      |
|           |           |           | Slc26a2    | Fem1c     | Cnr2        | Ulk2       |
|           |           |           | Rp2h       | Med26     | Zfp799      | Myadm      |
|           |           |           | Ranbp6     | Dcaf10    | Uaca        | Ikzf2      |
|           |           |           | Dock4      | Dcaf11    | Nelfcd      | Crlf2      |
|           |           |           | Osbpl6     | Wdr46     | Pbx3        | Psmg4      |
|           |           |           | Col4a5     | Ints10    | Tanc2       | D230025D16 |
|           |           |           | Dusp3      | Txlng     | Tmem126b    | Utrn       |
|           |           |           | Tmem127    | Trim68    | 1700021K19I | Bcdin3d    |
|           |           |           | Pomt1      | Ttpal     | Art4        | Sco1       |
|           |           |           |            | Psd3      | Xpc         | Cpeb4      |
|           |           |           |            | Zfp961    | Trim35      | Stx2       |
|           |           |           |            | Crot      | Ahdc1       | Syt14      |
|           |           |           |            | Mcur1     | Ctdspl      | Fstl1      |
|           |           |           |            | Gnpat     | Zfand2a     | Uap111     |
|           |           |           |            | Cercam    | Itpkb       | Exoc3l4    |
|           |           |           |            | Slc31a2   | Fut10       | Map3k15    |
|           |           |           |            | Mycbp     | Traf3       | Mphosph9   |
|           |           |           |            | Fitm2     | Cmah        | Osbpl2     |
|           |           |           |            | Fam160b1  | Eng         | Kdm7a      |
|           |           |           |            | Bcl2      | Lpgat1      | Sorbs3     |
|           |           |           |            | Strn      | Fam129b     | Tmem120b   |
|           |           |           |            | Anxa1     | Elac1       | Llgl1      |
|           |           |           |            | Tmem159   | Cnm4        | Mbd4       |
|           |           |           |            | Brf2      | Lyz2        | Taf4a      |
|           |           |           |            | Mpi       | Obfc1       |            |
|           |           |           |            | Pdk2      | Ccdc88b     |            |
|           |           |           |            | Pigb      | Lemd3       |            |
|           |           |           |            | Thumpd2   | Bbs5        |            |
|           |           |           |            | Kcnh2     | Otub2       |            |
|           |           |           |            | Rnf215    | Cdc42bpb    |            |
|           |           |           |            | Cdyl2     | Zswim8      |            |
|           |           |           |            | Cldn12    | Ctp         |            |
|           |           |           |            | Ankra2    | Arhgap4     |            |

|          |               |
|----------|---------------|
| Taok3    | 9530068E07Rik |
| Itgb1bp1 | Txnrd3        |
| Piga     | Sergef        |
| Hdac2    | St7l          |
| Mlh1     | F2rl3         |
| AU020206 | Ank3          |
|          | Gm5778        |
|          | Rab29         |
|          | Cdyl2         |
|          | Bod1          |
|          | Rasgef1b      |
|          | Rtn4ip1       |
|          | Afap1l1       |
|          | Zfp788        |
|          | Zcchc2        |
|          | Ralb          |
|          | Depdc1b       |
|          | Akr1b10       |
|          | Cd34          |
|          | Pds5b         |
|          | Cul7          |
|          | Mpp2          |
|          | Gm26532       |

---



Rik
